# Supplementary material
Source: PubMed Central journal article supplement (PMC8607008)
Supplement: mmc1.pdf [file mmc1.pdf]

**Cell Reports Medicine, Volume 2**

**Supplemental information**

**Weekly SARS-CoV-2 screening of asymptomatic  
kindergarten to grade 12 students and staff helps  
inform strategies for safer in-person learning**

**Shira Doron, Robin R. Ingalls, Anne Beauchamp, Jesse S. Boehm, Helen W. Boucher, Linda H. Chow, Linda Corridan, Katey Goehringer, Doug Golenbock, Liz Larsen, David Lussier, Marcia Testa, and Andrea Ciaranello**

**Weekly SARS-CoV-2 screening of asymptomatic kindergarten to grade 12 students and staff helps inform strategies for safer in-person learning**

**Supplemental Material**

Doron and Ingalls, *et al.*

**Table S1. Results of survey of families/caregivers and educators/staff (related to STAR Methods)**

| <b><u>Prior to/without baseline screening</u></b> |    | <b><u>After baseline screening</u></b> |    |
|---------------------------------------------------|----|----------------------------------------|----|
| Proportion self-reporting (%)*                    |    | Proportion self-reporting (%)*         |    |
| <b><i>Educators/staff</i></b>                     |    |                                        |    |
| Not comfortable                                   | 50 |                                        |    |
| Somewhat comfortable                              | 30 | Not reassured                          | 5  |
| Neutral                                           | 7  | Neutral                                | 13 |
| Mostly comfortable                                | 10 | Reassured                              | 53 |
| Very comfortable                                  | 2  | Very reassured                         | 29 |
| <b><i>Families/caregivers</i></b>                 |    |                                        |    |
| Not comfortable                                   | 18 |                                        |    |
| Somewhat comfortable                              | 31 | Not reassured                          | 1  |
| Neutral                                           | 12 | Neutral                                | 12 |
| Mostly comfortable                                | 27 | Reassured                              | 41 |
| Very comfortable                                  | 12 | Very reassured                         | 46 |

\*Survey responses were received from 491 educators/staff and 658 families/caregivers (78% with at least one student at middle or high school levels, 22% with students only in preK-5)
